# Supplementary material
Source: PubMed Central journal article supplement (PMC6708730)
Supplement: NIHMS1535871-supplement-4.pdf [file NIHMS1535871-supplement-4.pdf]

## **Supplemental Methods**

### **IHC Scoring**

MET proficiency methods are as described. In brief, FFPE tumor tissue blocks were cut, prepared, and analyzed with the Ventana Benchmark XT instrument as described in the Ventana product library ([productlibrary.ventana.com](http://productlibrary.ventana.com), search “790-4430”). The conditions for this general protocol were followed and further optimized at each participating site.

MET IHC status was also reported separately by MetMab scoring criteria, where 2+ or 3+ is considered positive<sup>11</sup>.
